# Supplementary material for: Germline mutation of TSC1 or TSC2 gene in Chinese patients with bilateral renal angiomyolipomas and mutation spectrum of Chinese TSC patients
Source: Aging (Albany NY). 2020 Jan 12;12(1):756–66. doi: 10.18632/aging.102654 (PMC6977674; doi:10.18632/aging.102654)
Supplement: Supplementary Table 1 [file aging-12-102654-s001..xlsx]

## Sheet: supplementary table1
Gene	Exon	Nucleotide change	Mutation type	Family history	Method	Reference
TSC1	E15	c.1807G>C	missense	unknown	NGS	senfen Wang2017
TSC1	E15	c.1564C>T	nonsense	unknown	NGS
TSC1	E15	c.1631C>T	missense	unknown	NGS
TSC2	E18	c.2032G>A	missense	unknown	NGS
TSC2	IN9	c.976-15G>A	splicing	unknown	NGS
TSC2	E37	c.4982dupG	frameshift	unknown	NGS
TSC2	E41	c.5405A>G	missense	unknown	NGS
TSC2	E8	c.799delC	frameshift	unknown	NGS
TSC2	E14	c.1528C>T	nonsense	unknown	NGS
TSC2	IN14	c.1599+2T>A	splicing	unknown	NGS
TSC2	E33	c.4305_4306delAG	frameshift	unknown	NGS
TSC2	E12	c.1330delA	frameshift	-	NGS	Dayong Bai2017
TSC2	E36	c.4714_4718del	frameshift	-	NGS
TSC2	E33	c.4375C>T	nonsense	-	NGS
TSC2	IN7	c.774+2T>G	splicing	-	NGS
TSC2	E14	c.1513C>T	nonsense	-	NGS
TSC2	IN33	c.4425-2A>G	splicing	-	NGS
TSC2	E33	c.4340C>G	nonsense	-	NGS
TSC2	E1_11	E1_11 deletion	deletion	+	NGS
TSC2	E7	c.681delC	frameshift	-	NGS
TSC2	IN11	c.1257+1G>T	splicing	+	NGS
TSC2	E22_31	E22_31deletion	deletion	+	NGS
TSC1	E18	c.2371C>T	nonsense	-	NGS
TSC1	E21_23	E21_23deletion	deletion	+	NGS
TSC2	E18	c.1964C>T	missense	+	sanger	Liu Linli2017
TSC2	E40	c.5238_5255delCATCAAGCGGCTCCGCCA	frameshift	-	sanger
TSC2	E32	c.3981_3982insA	frameshift	-	NGS	Pan Yunchun2017
TSC2	E33	c.4013_4014delCA	frameshift	+	NGS
TSC1	IN19	c.2503-2delA	splicing	unknown	sanger	Yu Tingting2017
TSC2	IN5	c.600-2A>G	splicing	unknown	sanger
TSC2	E14	c.1599G>C	missense	unknown	sanger
TSC2	E21	c.2433delC	frameshift	unknown	sanger
TSC2	E24	c.2766delG	frameshift	unknown	sanger
TSC2	E33	c.4027G>T	nonsense	unknown	sanger
TSC2	E34	c.4507C>T	nonsense	unknown	sanger
TSC2	E35	c.4646A>G	missense	unknown	sanger
TSC2	E36	c.4717dupG	frameshift	unknown	sanger
TSC2	E40	c.5227C>T	missense	unknown	sanger
TSC2	E29	c.3598C>T	missense	unknown	sanger
TSC2	E33	c.4066G>T	missense	unknown	sanger
TSC2	EX1_16	EX1_16del	deletion	-	NGS	Yang Guang2017
TSC2	EX2_30	EX2_30del	deletion	-	NGS
TSC2	EX23_28	EX23_28del	deletion	-	NGS
TSC2	EX2_3	EX2_3del	deletion	-	NGS
TSC2	EX2_3	EX2_3del	deletion	-	NGS
TSC2	EX2_42	EX2_42del	deletion	-	NGS
TSC2	EX2_42	EX2_42del	deletion	-	NGS
TSC2	EX36_41	EX36_41del	deletion	-	NGS
TSC2	EX3_15	E3_15del	deletion	-	NGS
TSC2	EX38_41	EX38_41del	deletion	-	NGS
TSC2	EX5_23	EX5_23dup	duplication	-	NGS
TSC2	EX1	c.42_43insT	frameshift	-	NGS
TSC2	EX4	c.462delC	frameshift	-	NGS
TSC2	EX5	c.516_517delGT	frameshift	+	NGS
TSC2	EX5	c.529delC	frameshift	+	NGS
TSC2	EX6	c.602-602delT	frameshift	-	NGS
TSC2	EX6	c.606delC	frameshift	+	NGS
TSC2	EX8	c.830_833dupGCCA	frameshift	-	NGS
TSC2	EX9	c.899-900insT	frameshift	-	NGS
TSC2	EX9	c.885-886insGCT	frameshift	-	NGS
TSC2	E10	c.1093_1095delATC	frameshift	-	NGS
TSC2	E11	c.1185-1186delTG	frameshift	-	NGS
TSC2	E14	c.1491delC	frameshift	-	NGS
TSC2	E14	c.1595-1597delAGA	frameshift	-	NGS
TSC2	E15	c.1639-1640insA	frameshift	-	NGS
TSC2	E15	c.1610_1614delGCTCC	frameshift	-	NGS
TSC2	E18	c.1981_1985delGGCCC	frameshift	-	NGS
TSC2	E19	c.2102-2105delCTGA	frameshift	-	NGS
TSC2	E20	c.2348_2351delCCAA	frameshift	-	NGS
TSC2	E21	c.2395delC	frameshift	+	NGS
TSC2	E21	c.2451-2452insA	frameshift	-	NGS
TSC2	E26	c.3097_3098dupTA	frameshift	-	NGS
TSC2	E28	c.3319-3320insG	frameshift	-	NGS
TSC2	E28	c.3290-3291insC	frameshift	-	NGS
TSC2	E33	c.4114-4123del10	frameshift	-	NGS
TSC2	E33	c.4305-4306delAG	frameshift	-	NGS
TSC2	E33	c.4255-4258delCAGT	frameshift	-	NGS
TSC2	E33	c.4014dupA	frameshift	-	NGS
TSC2	E33	c.4236dupT	frameshift	-	NGS
TSC2	E33	c.4264delA	frameshift	-	NGS
TSC2	E34	c.4544_4547delACAA	frameshift	-	NGS
TSC2	E34	c.4541-4544delCAAA	frameshift	-	NGS
TSC2	E35	c.4578delC	frameshift	-	NGS
TSC2	E35	c.4732-4741del	frameshift	-	NGS
TSC2	E36	c.4734-4735insGGCC	frameshift	-	NGS
TSC2	E36	c.4823_4824insAATA	frameshift	-	NGS
TSC2	E38	c.5021delC	frameshift	-	NGS
TSC2	E40	c.5171-5172insG	frameshift	-	NGS
TSC2	E40	c.5238_5255delCATCAAGCGGCTCCGCCA	frameshift	-	NGS
TSC2	E40	c.5238-5255del18	frameshift	-	NGS
TSC2	E40	c.5238-5255del18	frameshift	-	NGS
TSC2	E40	c.5422-5423delTG	frameshift	-	NGS
TSC2	E39	c.5147_5160+31del45	frameshift	-	NGS
TSC2	IN11	c.1257+1G>C	splicing	-	NGS
TSC2	IN17	c.1946+1G>A	splicing	-	NGS
TSC2	IN19	c.2221-1G>C	splicing	-	NGS
TSC2	IN21	c.2545+2T>C	splicing	-	NGS
TSC2	IN31	c.3884-1G>A	splicing	-	NGS
TSC2	IN35	c.4662+1G>T	splicing	-	NGS
TSC2	IN38	c.5069-2A>G	splicing	-	NGS
TSC2	IN39	c.5160+1G>T	splicing	+	NGS
TSC2	E1	c.100A>T	nonsense	-	NGS
TSC2	E3	c.246G>A	nonsense	+	NGS
TSC2	E4	c.440C>G	nonsense	-	NGS
TSC2	E5	c.496C>T	nonsense	+	NGS
TSC2	E5	c.500G>A	nonsense	-	NGS
TSC2	E9	c.855C>A	nonsense	-	NGS
TSC2	E14	c.1599G>C	missense	-	NGS
TSC2	E16	c.1832G>A	missense	-	NGS
TSC2	E16	c.G1832G/A	missense	-	NGS
TSC2	E16	c.1831C>T	missense	-	NGS
TSC2	E16	c.1831C>T	missense	-	NGS
TSC2	E19	c.2108G>A	nonsense	-	NGS
TSC2	E19	c.2117T>C	missense	-	NGS
TSC2	E20	c.2251C>T	nonsense	-	NGS
TSC2	E20	c.2251C>T	nonsense	-	NGS
TSC2	E21	c.2531T>C	missense	-	NGS
TSC2	E23	c.2713C>T	missense	-	NGS
TSC2	E26	c.3094C>T	nonsense	+	NGS
TSC2	E26	c.3028C>T	nonsense	-	NGS
TSC2	E29	c.3412C>T	nonsense	-	NGS
TSC2	E29	c.3412C>T	nonsense	-	NGS
TSC2	E33	c.4375C>T	nonsense	-	NGS
TSC2	E33	c.4183C>T	nonsense	-	NGS
TSC2	E35	c.4657C>T	missense	-	NGS
TSC2	E35	c.4630A>T	nonsense	-	NGS
TSC2	E38	c.5024C>T	missense	-	NGS
TSC2	E40	c.5228G>A	missense	-	NGS
TSC2	E40	c.5228G>A	missense	-	NGS
TSC2	E40	c.5227C>T	missense	-	NGS
TSC2	E40	c.5227C>T	missense	-	NGS
TSC2	E40	c.5227C>T	missense	-	NGS
TSC2	E40	c.5220G>A	nonsense	-	NGS
TSC2	E40	c.5228G>A	missense	-	NGS
TSC2	E40	c.5227C>T	missense	-	NGS
TSC2	E40	c.5228G>A	missense	-	NGS
TSC2	E38	c.5024C>T	missense	-	NGS
TSC2	E1	c.115-119delATCAT	frameshift	-	NGS
TSC2	E9	c.905-906delCT	frameshift	-	NGS
TSC2	E12	c.1331delA	frameshift	-	NGS
TSC2	E15	c.1716G>A	missense	-	NGS
TSC1	E6	c.445C>T	nonsense	-	NGS
TSC1	E8	c.733C>T	nonsense	-	NGS
TSC1	E8	c.733C>T	nonsense	-	NGS
TSC1	E15	c.1525C>T	nonsense	-	NGS
TSC1	E18	c.2227C>T	nonsense	-	NGS
TSC1	E19	c.2299C>T	nonsense	-	NGS
TSC1	E20	c.2347C>T	nonsense	-	NGS
TSC1	E21	c.2356C>T	nonsense	+	NGS
TSC1	E21	c.2692C>T	nonsense	-	NGS
TSC1	E3	c.280-281delTG	nonsense	+	NGS
TSC1	E15	c.1515-1516delTC	frameshift	-	NGS
TSC1	E15	c.1560delC	frameshift	+	NGS
TSC1	E15	c.1846delG	frameshift	-	NGS
TSC1	E9	c.892_893insC	frameshift	+	NGS
TSC1	IN9	c.913+1G>A	splicing	-	NGS
TSC1	E13	EX13del	deletion	-	NGS
TSC2	E27	c.3206_3207delTG	frameshift	-	NGS	Li Wenzao2016
TSC2	E17	c.2083C>T	nonsense	-	sanger	Chen Hui2016
TSC2	E3	c.311_312insGCTG	frameshift	-	sanger	Wang Yuguo2016
TSC2	E16	c.1790A>G	missense	-	sanger
TSC2	E33	c.4258_426ldelTCAG	frameshift	-	sanger	Zhang Zhengzhong2015
TSC1	E15	c.1525C>[T	nonsense	+	sanger	Zhang Yu2015
TSC2	E29	c. 3576_3577insA	frameshift	+	sanger	Luo Rong2015
TSC2	E23	c.2690delT	frameshift	+	sanger	Yu Zheng2014
TSC2	E3	c.245G>A	nonsense	-	NGS	Liu Qing2014
TSC2	E41	c.5405_5408dupACTT	frameshift	-	NGS
TSC2	IN29	c.3610+1G>C	splicing	-	sanger	Mi CR2014
TSC2	E39	c.5090_5092delCCA	frameshift	-	sanger
TSC1	E15	c.1605_1612delTTTTTAGG	frameshift	+	sanger	Zuo Fuguang2013
TSC1	E15	c.1877_1878insT	frameshift	-	sanger
TSC1	E18	c.2020delA	frameshift	+	sanger
TSC1	E12	c.1186T>C	missense	+	sanger
TSC1	E12	c.1186T>C	missense	+	sanger
TSC1	E12	c.1186T>C	missense	+	sanger
TSC2	E40	c.5238_5255del	frameshift	+	sanger	Wang GX2011
TSC2	E28	c.3312_3313delGA	frameshift	-	sanger
TSC2	E1	c.45delT	frameshift	+	sanger
TSC2	E3	c.268C>T	nonsense	-	sanger	Yuan Chengda2007
TSC2	E40	c.5227C>T	missense	-	sanger
TSC2	E26	c.3099delC	frameshift	+	sanger	Zhao XY2006
TSC2	E33	c.4420_4424delAGAGT	frameshift	-	sanger
TSC2	E4	c.469G>T	nonsense	unknown	sanger	Feng JH2004
TSC2	E19	c.2163del G	frameshift	unknown	sanger
TSC2	E24	c.2767_2768insC	frameshift	unknown	sanger
TSC2	E28	c.3355C>T	nonsense	unknown	sanger
TSC2	E37	c.4952A>G	missense	unknown	sanger
TSC2	E37	c.4958C>T	missense	unknown	sanger
TSC2	E38	c.5024C>T	missense	unknown	sanger
TSC2	IN38	c.5068+20_5068+21ins34	splicing	unknown	sanger
TSC2	E40	c.5238_5255del	frameshift	unknown	sanger
TSC2	E40	c.5238_5255del	frameshift	unknown	sanger
TSC2	E11	c.1228_1229 insG	frameshift	unknown	NGS	Gao Shan2018
TSC2	E37	c.4925G>A	missense	unknown	NGS
TSC2	E9	c.899G > T	missense	+	sanger	Wang F2018
TSC1	E15	c.1846delG	frameshift	+	sanger	Cui2018
TSC2	E36	c.4813C>T	nonsense	+	NGS	Gu Xiaoyan2018
TSC2	E7	c.682C>T	nonsense	+	NGS
TSC2	E40	c.5228G>T	missense	+	NGS
TSC2	E19	c.2125G>T	frameshift	+	NGS
TSC2	E17	c.1939G>A	missense	+	NGS
TSC2	E20	c.2251C>T	nonsense	+	NGS
TSC2	E11	c.1139T>C	missense	+	NGS
TSC1	E15	c.1525C>T	nonsense	-	NGS
TSC2	E29	c.3599G>C	missense	-	NGS
TSC2	E5	c.557delT	frameshift	-	NGS
TSC2	E36	c.4728delG	frameshift	-	NGS
TSC2	E21	c.2447C>T	missense	-	NGS
TSC2	E23	c.2717_2725dupAGGATTTTG	frameshift	-	NGS
TSC2	E16	c.1832G>A	missense	unknown	NGS	Pan Yuchun2018
TSC2	E40	c.5227C>T	missense	unknown	NGS
TSC2	E23	c.2713C>T	missense	unknown	NGS
TSC2	E21	c.2415_2416insGT	frameshift	unknown	NGS
TSC2	E16	c.1832G>C	missense	unknown	NGS
TSC1	E17	c.2074C>T	nonsense	unknown	NGS
TSC2	E28	c.3352C>T	nonsense	unknown	NGS
TSC2	E38	c.5024C>t	missense	unknown	NGS
TSC2	E13	c.1432C>T	nonsense	unknown	NGS
TSC2	E9	c.880G>A	missense	unknown	NGS
TSC1	E8	c.733C>T	nonsense	+	sanger	Li Shuqiang2017
TSC2	E8	c.788_789insC	frameshift	+	sanger
TSC1	IN10	c.1030‑1G>A	splicing	+	sanger	Zhao Tingting2017
TSC2	IN5	c.600-145 C > T	splicing	+	NGS	YE Y2019
TSC1	E8	c.733C>T	nonsense	+	NGS	Li Shuqiang2017
TSC1	E18	c.2227C>T	nonsense	unknown	NGS
TSC1	E9_12	EX9_12 DEL	deletion	unknown	NGS
TSC2	E11	c.1249C>T	nonsense	unknown	NGS
TSC2	E27	c.3235G>T	missense	unknown	NGS
TSC2	E29	c.3412C>T	nonsense	unknown	NGS
TSC2	E33	c.4129C>T	nonsense	unknown	NGS
TSC2	29	c.3412C>T	nonsense	unknown	NGS
TSC2	E29	c.3412C>T	nonsense	unknown	NGS
TSC2	E2	c.203_204insA	frameshift	unknown	NGS
TSC2	E8	c.788_789insC	frameshift	+	NGS
TSC2	E8	c.788_789 insC	frameshift	+	NGS
TSC2	E23	c.2738_2739 insT	frameshift	unknown	NGS
TSC2	E30	c.3683_3684insG	frameshift	unknown	NGS
TSC2	E33	c.4006_4007insC	frameshift	unknown	NGS
TSC2	E37	c.4926delC	frameshift	unknown	NGS
TSC2	E29	c.3601_3602insGGCCC	frameshift	unknown	NGS
TSC2	E22_24	EX22_24 DEL	deletion	unknown	NGS
TSC2	E40	c.5228G>A	missense	unknown	NGS
TSC2	E39	c.5126C>T	missense	unknown	NGS
TSC2	E29	c.3610G > A	missense	+	NGS	Zhang Ruixiao2018
TSC2	EX2_16	EX2_16 DEL	Deletion	-	NGS	Cai 2017
TSC2	EX3	c.203_204 insA	Frameshift	+	NGS
TSC2	EX3	c.203_204 insA	Frameshift	+	NGS
TSC2	EX3	c.203_204 insA	Frameshift	+	NGS
TSC2	EX3	c.203_204 insA	Frameshift	+	NGS
TSC2	EX9	c.788_789 insC	Frameshift	+	NGS
TSC2	EX9	c.788_789 insC	Frameshift	+	NGS
TSC2	EX13	c.1372C>T	Nonsense	+	NGS
TSC2	EX13	c.1372C>T	Nonsense	+	NGS
TSC2	EX15	c.1507C>T	Nonsense	-	NGS
TSC2	EX16	c.1832G>A	Missense	-	NGS
TSC2	EX20	c.2251C>T	Nonsense	-	NGS
TSC2	EX21	c.2319 delA	Frameshift	-	NGS
TSC2	EX22	c.2367C>T	Silent	-	NGS
TSC2	EX22_24	EX22_24 DEL	Deletion	-	NGS
TSC2	EX24	c.2738_2739 insT	Frameshift	-	NGS
TSC2	EX30	c.3412C>T	Nonsense	+	NGS
TSC2	EX30	c.3412C>T	Nonsense	+	NGS
TSC2	EX30	c.3412C>T	Nonsense	+	NGS
TSC2	EX30	c.3601_3602 insGGCCC	Frameshift	-	NGS
TSC2	EX31	c.3750C>G	Nonsense	-	NGS
TSC2	EX31	c.3683_3684 insG	Frameshift	-	NGS
TSC2	EX34	c.4255C>T	Nonsense	-	NGS
TSC2	EX34	c.4129C>T	Nonsense	+	NGS
TSC2	EX34	c.4129C>T	Nonsense	+	NGS
TSC2	EX34	c.4006_4007 insC	Frameshift	-	NGS
TSC2	EX36	c.4708A>T	Missense	+	NGS
TSC2	EX36	c.4708A>T	Missense	+	NGS
TSC2	EX38	c.4926delC	Frameshift	-	NGS
TSC2	EX39	c.5024C>T	Missense	+	NGS
TSC2	EX39	c.5024C>T	Missense	+	NGS
TSC2	EX40	c.5227C>T	Missense	-	NGS
TSC2	EX40	c.5126 C > T	Missense	-	NGS
TSC2	IN18	c.1947-1G>C	Splice	-	NGS
TSC2	IN19	c.2098-2A>G	Splice	-	NGS
TSC1	EX8	c.733C>T	Nonsense	+	NGS
TSC1	EX8	c.733C>T	Nonsense	+	NGS
TSC1	EX18	c.2227C>T	Nonsense	-	NGS
TSC1	EX9_12	EX9_12 DEL	Deletion	-	NGS
TSC1	EX18	c.2448C>T	Nonsense	-	NGS
TSC1	IN20	c.2626 -4_-3 insTT	Splicing	-	NGS
TSC2	E4	c.433G>T	missense	+	NGS	This study
TSC2	E11	EX11 Del	deletion	-	NGS
TSC2	E11_15	E11-15 DUP (homo)	duplication	-	NGS
TSC2	E13	c.1372C>T	nonsense	-	NGS
TSC2	E14	c.1513C＞T	nonsense	+	NGS
TSC2	E16	c.1831C>T	missense	-	NGS
TSC2	E18	c.2083C>T	nonsense	-	NGS
TSC2	E19	c.2102_2105 delCTGA	frameshift	-	NGS
TSC2	E19	c.2138T>C	missense	-	NGS
TSC2	E26	c.3046delA	frameshift	-	NGS
TSC2	E29	c.3412C>T	nonsense	-	NGS
TSC2	E29	c.3412C>T	nonsense	-	NGS
TSC2	E29	c.3582G>A	nonsense	+	NGS
TSC2	E30	c.3685C>T	nonsense	-	NGS
TSC2	E30	c.3803G>A	missense	-	NGS
TSC2	E33	c.4418_4419/delAG	frameshift	-	NGS
TSC2	E33	c.4425_4426 delAG	frameshift	+	NGS
TSC2	E33	c.4493_c.4493+18delGGTGGGCCTCTTGCTTCCG	frameshift	-	NGS
TSC2	E36	c.4737C>T	missense	-	NGS
TSC2	E36	c.4783G>A	missense	-	NGS
TSC2	E39	c.5155G>C	missense	-	NGS
TSC2	E40	c.5175_5176del/GC	frameshift	+	NGS
TSC2	E40	c.5237_5238insC	frameshift	-	NGS
TSC2	IN8	c.849-1G>A	splicing	-	NGS
TSC2	IN13	c.1444-1G>C	splicing	-	NGS
TSC2	IN14	c.1600-1G>C	splicing	-	NGS
TSC2	IN29	c.3610+1G>A	splicing	-	NGS
TSC2	E5	c.372delT	frameshift	-	NGS
TSC1	E6	c.433C>T	nonsense	-	NGS
TSC1	E15	c.1960C>G	missense	-	NGS
